# Supplementary material for: Synthesis of tunable ZnS–CuS microspheres and visible-light photoactivity for rhodamine B
Source: Royal Society of Chemistry journal article supplement (doi:10.1039/c4nj00264d), 2014-01-01
Supplement: c4nj00264d1.pdf [file c4nj00264d1.pdf]

### Electronic Supplementary Information(ESI)

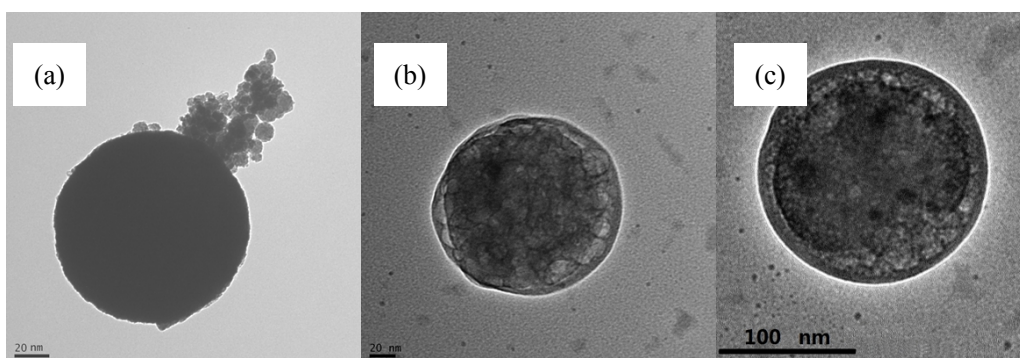

**Figure S 1.** TEM image of the solid ZnS sphere(a), ZnS/CuS samples obtained in 1h(b) and 3h(c)

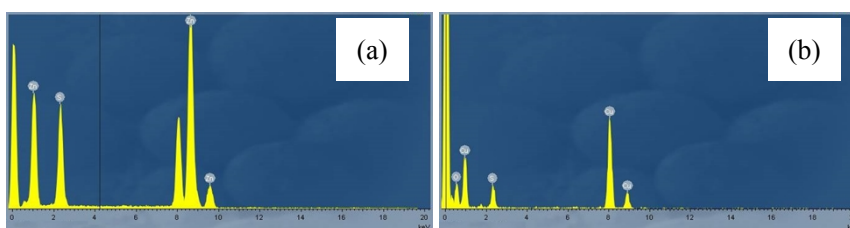

**Figure S 2.** EDS image of the solid ZnS sphere(a), ZnS/CuS samples obtained in 1h and 3h (b)

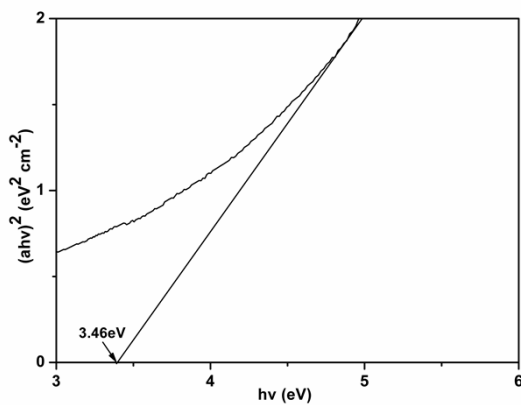

**Figure S 3.** The plots of the  $(ah\nu)^2$  vs photon energy ( $h\nu$ ) for ZnS

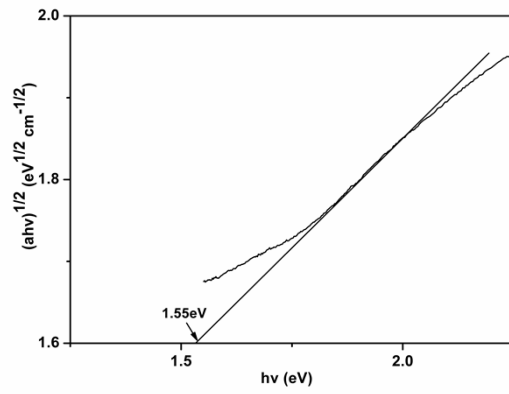

Figure S 4. The plots of the  $(ah\nu)^{1/2}$  vs photon energy ( $h\nu$ ) for CuS

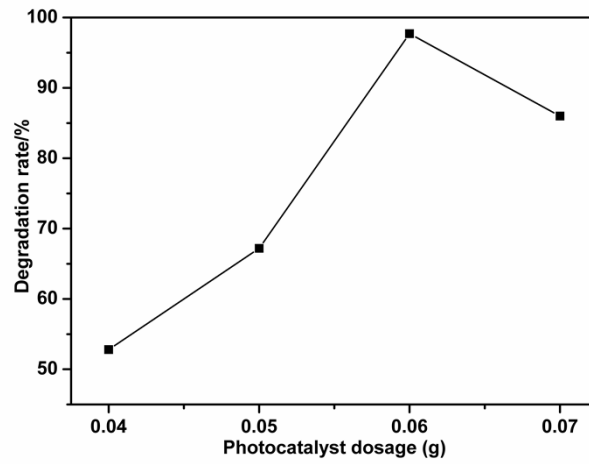

Figure S 5. Effect of catalyst loading on RhB degradation.

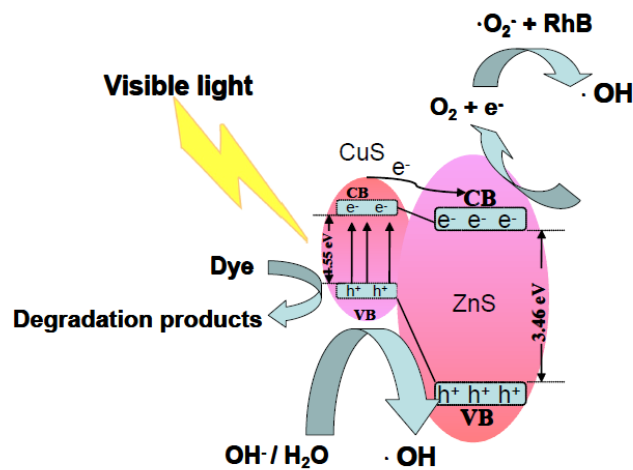

Scheme S 1. The photocatalytic mechanism of CuS/ZnS samples for degrading RhB under visible light
